# Supplementary material
Source: PubMed Central journal article supplement (PMC6533596)
Supplement: ac8b05615_si_001.pdf [file ac8b05615_si_001.pdf]

## ***Supporting Information***

### **A Microdialysis Workflow for Metabotyping Superficial Pathologies: Application to Burn Injury**

**Dominic Friston<sup>1</sup>, Helen Laycock<sup>1</sup>, Istvan Nagy<sup>1</sup>, Elizabeth J. Want<sup>2\*</sup>**

<sup>1</sup>Nociception Group, Section of Anaesthetic, Pain Medicine and Intensive Care, Department of Surgery and Cancer, Imperial College London, London UK

<sup>2</sup>Integrative Systems Medicine and Digestive Diseases; Department of Surgery and Cancer, Imperial College London, London UK

**\*corresponding author: [e.want@imperial.ac.uk](mailto:e.want@imperial.ac.uk)**

#### **Table of Contents**

**P2. Table S1. A description of the different sample groups, together with the number of samples collected and analysed during the study.**

**P3. Table S2. The top 30 metabolite features as ranked by VIP value from PLS-DA analysis in positive and negative mode respectively. *RT = retention time in seconds.***

**Table S1. A description of the different sample groups, together with the number of samples collected and analysed during the study.**

| <b>Sample Group</b>    | <b>Number of samples/animal</b> | <b>Number of animals</b> | <b>Total</b> | <b>Description</b>                                                                                                    |
|------------------------|---------------------------------|--------------------------|--------------|-----------------------------------------------------------------------------------------------------------------------|
| <b>Burn</b>            | <b>6</b>                        | <b>4</b>                 | <b>24</b>    | <i>Microdialysate fractions collected from the BURN site AFTER the burn induction.</i>                                |
| <b>Control</b>         | <b>6</b>                        | <b>4</b>                 | <b>24</b>    | <i>Microdialysate fractions collected from the CONTROL site AFTER the burn induction.</i>                             |
| <b>Pre-burn Flush</b>  | <b>2</b>                        | <b>4</b>                 | <b>8</b>     | <i>The single "flush" microdialysate fractions collected from BOTH microdialysis sites BEFORE the burn induction.</i> |
| <b>Quality Control</b> |                                 |                          | <b>1</b>     | <i>Mixtures of all microdialysates injected throughout the run for monitoring UPLC-MS stability.</i>                  |

**Table S2. The top 30 metabolite features as ranked by VIP value from PLS-DA analysis in positive and negative mode respectively. *RT = retention time in seconds.***

| Positive Mode | Feature (m/z/RT) | VIP value | Negative Mode | Feature (m/z/RT) | VIP value |
|---------------|------------------|-----------|---------------|------------------|-----------|
|               | 1029.1/331       | 4.32004   |               | 281/188          | 3.74991   |
|               | 1028.8/332       | 4.28977   |               | 736.9/86         | 3.68634   |
|               | 1029.8/332       | 4.28663   |               | 926.9/86         | 3.57676   |
|               | 591.2/221        | 4.26254   |               | 296.1/186        | 3.55986   |
|               | 938.9/334        | 4.23014   |               | 1051/86          | 3.54795   |
|               | 1022.1/331       | 4.21074   |               | 378.1/208        | 3.48508   |
|               | 598.6/274        | 4.18326   |               | 926.3/333        | 3.43265   |
|               | 605.6/273        | 4.17587   |               | 827.4/627        | 3.40225   |
|               | 580.2/221        | 4.16793   |               | 737.9/86         | 3.39798   |
|               | 479.1/265        | 4.16299   |               | 826.4/627        | 3.39054   |
|               | 241.1/36         | 4.14028   |               | 281.1/265        | 3.37713   |
|               | 1152.8/323       | 4.1053    |               | 343/60           | 3.34414   |
|               | 584.6/299        | 4.07239   |               | 281.1/253        | 3.3383    |
|               | 1160.8/323       | 4.06432   |               | 540.9/86         | 3.32827   |
|               | 1153.8/323       | 4.0474    |               | 319.2/503        | 3.27589   |
|               | 967.4/339        | 4.03355   |               | 337/41           | 3.26099   |
|               | 1028.9/381       | 4.01782   |               | 351/177          | 3.26068   |
|               | 939.9/334        | 3.98913   |               | 925.8/333        | 3.25349   |
|               | 760.4/284        | 3.98441   |               | 365/60           | 3.24528   |
|               | 1021.8/357       | 3.97549   |               | 225.1/36         | 3.23956   |
|               | 939.4/335        | 3.96471   |               | 547/86           | 3.23445   |
|               | 1028.8/356       | 3.9451    |               | 927.9/86         | 3.23045   |
|               | 939.4/334        | 3.94004   |               | 1116.9/86        | 3.22414   |
|               | 1055.8/352       | 3.92358   |               | 920.9/86         | 3.21574   |
|               | 396.7/181        | 3.91901   |               | 548/86           | 3.17935   |
|               | 1029.2/381       | 3.91443   |               | 284/177          | 3.17277   |
|               | 479.1/252        | 3.90525   |               | 1116.9/86        | 3.16146   |
|               | 585/299          | 3.90098   |               | 320.2/503        | 3.15953   |
|               | 631.2/265        | 3.88911   |               | 920.9/86         | 3.1566    |
|               | 570.3/195        | 3.87106   |               | 715/86           | 3.15085   |
|               | 1029.1/331       | 4.32004   |               | 281/188          | 3.74991   |
